# Supplementary material for: The DME demethylase regulates sporophyte gene expression, cell proliferation, differentiation, and meristem resurrection
Source: PubMed Central journal article supplement — Proc Natl Acad Sci U S A. 2021 Jul 15;118(29):e2026806118. doi: 10.1073/pnas.2026806118 (PMC8307533; doi:10.1073/pnas.2026806118), 2021-07-15
Supplement: pnas.2026806118.sapp.pdf [file pnas.2026806118.sapp.pdf]

## SI APPENDIX

Kim *et al.* The DME demethylase regulates sporophyte gene expression, cell proliferation, differentiation and meristem resurrection

### SI Materials and Methods

**Seed Germination Analysis.** Wild-type and viable homozygous *dme-2* seeds were sterilized and sown with a sterilized Pasteur pipette, one by one on a MS plate. MS plates were covered with aluminum foil for dark treatment. After 3 days of dark 4°C treatment, the foil was removed and incubated in a cold room with continuous light. Seed counting was performed in the cold-room to prevent temperature changes. Seed coat ruptured seeds were the imbibed seeds showing a crack on their surface and endosperm ruptured seeds were the ones with a visible radicle.

**RAM Visualization.** Seeds were sterilized with a 0.5% TritonX100, 75% EtOH solution and sown on square form 0.5X MS media plates (0.5X Mushirage and Sqoog medium, 1% Phytoagar) in a single line. MS plates were placed in cold-dark for 3 days and grown vertically in a long-day (16 hrs light/8 hrs dark) photoperiod under cool white fluorescent light (100  $\mu\text{mole/m}^2/\text{s}$ ) at 22°C with 60% humidity. Root tips were cut using a sharp knife on the medium. Samples were mounted on slide glass with 1 $\mu\text{g/ml}$  PI solution. All samples were visualized under 40x water immersion lens, RFP filter, LSM700 (Carl Zeiss).

**Observation of Root Hair Phenotypes.** Root hair phenotypes were observed under a stereomicroscope (M205 FA;Leica). Root hair length was measured as described by Lee and Cho (1) with modifications. Roots of 3-d-old seedlings were digitally photographed using the stereomicroscope at 40X magnification. The hair length of nine consecutive hairs protruding perpendicularly from each side of the root, for a total of 18 hairs from both sides of the root, was calculated using ImageJ 1.50b software (National Institutes of Health). To assess root hair cell distribution in the root epidermis, the ratio of root hair-containing cells in 10 consecutive epidermal cells from the H (root hair cell) position or from the N (non-root-hair cell) position was estimated from 15 to 20 roots of 4-d-old seedlings for each line.

**Stomata Visualization and Normalization.** DAG5 seedling cotyledon were cut with a sharp knife and mounted with 1 $\mu\text{g/ml}$  PI on a slide glass. Samples were visualized with under 40x water immersion lens, RFP filter, LSM700 (Carl Zeiss). All photographs were in 123.11 $\mu\text{m}^2$  size, same magnification. Stomata and precursor cells on each image were identified by their morphology and counted. After accumulation of data, all numbers were normalized by 25000 $\mu\text{m}^2$  area for comparison.

**Plant Growth and Flowering Resurrection Study.** At least 16 plants were sown and transferred the same day and grown in the same environment. After bolting, the main stem was hand-measured with a ruler and documented. All plants were watered even after termination to check the resurrection phenotype. After the second termination, silique numbers were counted and recorded.

### Generation of *dme-2/dme-2* homozygous lines

We used the following genetic strategy to isolate a *dme-2* homozygous mutant plant. First, *dme-*

1 homozygous female plants were pollinated with *dme-2/+* heterozygous pollen, to generate *dme-1/dme-2* F1 mutant plants. Next, the *dme-1/dme-2* F1 plants were self-pollinated, and a total of 63 viable F2 plants were obtained with the following genotypes confirmed by molecular analyses (*SI Appendix*, Fig. S2): 25 *dme-1/dme-1*, 31 *dme-1/dme-2*, and 7 *dme-2/dme-2*, which displayed F3 seed abortion ratios of 91.5 %, 96.8, and 97.1 %, respectively (Fig. 1B and *SI Appendix*, Table S1). Thus, we generated multiple, independent *dme-2/dme-2* homozygous mutants lines for subsequent phenotypic analyses.

1. S. H. Lee, H. T. Cho, PINOID positively regulates auxin efflux in Arabidopsis root hair cells and tobacco cells. *Plant Cell* **18**, 1604-1616 (2006).
2. T. F. Hsieh *et al.*, Regulation of imprinted gene expression in Arabidopsis endosperm. *Proc Natl Acad Sci U S A* **108**, 1755-1762 (2011).

|                                                       | <i>dme-1/dme-1</i> |        | <i>dme-1/dme-2</i> |        | <i>dme-2/dme-2</i> |               |      |       |
|-------------------------------------------------------|--------------------|--------|--------------------|--------|--------------------|---------------|------|-------|
|                                                       | Abortion           | Normal | Abortion           | Normal | Abortion           | Normal        |      |       |
| <b>#1</b>                                             | 51                 | 4      | <b>#4</b>          | 47     | 3                  | <b>#2</b>     | 53   | 2     |
| <b>90.20%</b>                                         | 45                 | 10     | <b>93.10%</b>      | 49     | 5                  | <b>95.60%</b> | 49   | 3     |
|                                                       | 50                 | 4      |                    | 55     | 5                  |               | 56   | 4     |
|                                                       | 48                 | 3      |                    | 51     | 2                  |               | 58   | 1     |
|                                                       | 194                | 21     |                    | 202    | 15                 |               | 216  | 10    |
| <b>#3</b>                                             | 57                 | 4      | <b>#7</b>          | 49     | 1                  | <b>#5</b>     | 49   | 2     |
| <b>91.00%</b>                                         | 46                 | 5      | <b>98.60%</b>      | 50     | 0                  | <b>96.60%</b> | 50   | 2     |
|                                                       | 55                 | 8      |                    | 60     | 0                  |               | 51   | 1     |
|                                                       | 54                 | 4      |                    | 52     | 2                  |               | 46   | 2     |
|                                                       | 212                | 21     |                    | 211    | 3                  |               | 196  | 7     |
| <b>#6</b>                                             | 37                 | 3      | <b>#8</b>          | 51     | 0                  | <b>#9</b>     | 48   | 0     |
| <b>88.30%</b>                                         | 38                 | 5      | <b>99.50%</b>      | 58     | 0                  | <b>96.00%</b> | 33   | 3     |
|                                                       | 42                 | 6      |                    | 51     | 0                  |               | 47   | 1     |
|                                                       | 41                 | 7      |                    | 51     | 1                  |               | 38   | 3     |
|                                                       | 158                | 21     |                    | 211    | 1                  |               | 166  | 7     |
| <b>#10</b>                                            | 51                 | 6      | <b>#24</b>         | 53     | 0                  | <b>#23</b>    | 41   | 1     |
| <b>91.00%</b>                                         | 45                 | 2      | <b>97.80%</b>      | 40     | 1                  | <b>98.20%</b> | 36   | 1     |
|                                                       | 36                 | 5      |                    | 45     | 2                  |               | 49   | 0     |
|                                                       | 51                 | 5      |                    | 39     | 1                  |               | 37   | 1     |
|                                                       | 183                | 18     |                    | 177    | 4                  |               | 163  | 3     |
| <b>#13</b>                                            | 41                 | 1      | <b>#25</b>         | 51     | 0                  | <b>#28</b>    | 44   | 2     |
| <b>98.50%</b>                                         | 51                 | 1      | <b>97.90%</b>      | 43     | 1                  | <b>98.40%</b> | 44   | 0     |
|                                                       | 49                 | 1      |                    | 50     | 2                  |               | 48   | 0     |
|                                                       | 54                 | 0      |                    | 39     | 1                  |               | 46   | 1     |
|                                                       | 195                | 3      |                    | 183    | 4                  |               | 182  | 3     |
| <b>#27</b>                                            | 45                 | 4      | <b>#32</b>         | 44     | 5                  | <b>#31</b>    | 51   | 0     |
| <b>91.60%</b>                                         | 48                 | 3      | <b>93.40%</b>      | 49     | 6                  | <b>98.50%</b> | 44   | 1     |
|                                                       | 40                 | 8      |                    | 54     | 2                  |               | 43   | 0     |
|                                                       | 41                 | 1      |                    | 50     | 1                  |               | 54   | 2     |
|                                                       | 174                | 16     |                    | 197    | 14                 |               | 192  | 3     |
| <b>#38</b>                                            | 46                 | 6      | <b>#36</b>         | 52     | 1                  | <b>#37</b>    | 47   | 3     |
| <b>89.60%</b>                                         | 48                 | 9      | <b>97.40%</b>      | 46     | 2                  | <b>97.10%</b> | 38   | 0     |
|                                                       | 50                 | 5      |                    | 52     | 1                  |               | 48   | 1     |
|                                                       | 46                 | 2      |                    | 39     | 1                  |               | 36   | 1     |
|                                                       | 190                | 22     |                    | 189    | 5                  |               | 169  | 5     |
| <b>Total<br/>Seeds/Silique<br/>Abortion<br/>Ratio</b> | 1306               | 122    |                    | 1370   | 46                 |               | 1284 | 38    |
|                                                       |                    | 51     |                    |        | 50.6               |               |      | 47.2  |
|                                                       |                    | 91.5%  |                    |        | 96.8%              |               |      | 97.1% |

**Table S1.** Seed abortion ratio in *dme-1* and *dme-2* homozygous plants

|                                                 | Id        | Gene symbol | Short description                                                   |
|-------------------------------------------------|-----------|-------------|---------------------------------------------------------------------|
| Up-regulated in both <i>dme</i> & <i>ros1</i>   | AT1G14650 | AT1G14650   | SWAP(Suppressor-of-White-APricot)/surp domain-containing protein    |
|                                                 | AT1G31580 | ECS1        | ECS1                                                                |
|                                                 | AT4G05020 | NDB2        | NAD(P)H dehydrogenase B2                                            |
|                                                 | AT4G13420 | HAK5        | high affinity K transporter 5                                       |
|                                                 | AT4G19520 | AT4G19520   | disease resistance protein (TIR-NBS-LRR class) family               |
| Down-regulated in both <i>dme</i> & <i>ros1</i> | AT1G44608 | AT1G44608   |                                                                     |
|                                                 | AT1G59980 | ARL2        | ARG1-like 2                                                         |
|                                                 | AT1G62760 | AT1G62760   | Plant invertase/pectin methylesterase inhibitor superfamily protein |
|                                                 | AT1G67105 | AT1G67105   | other RNA                                                           |
|                                                 | AT2G40610 | EXPA8       | expansin A8                                                         |
|                                                 | AT3G43850 | AT3G43850   |                                                                     |
| Up-regulated in both <i>dme</i> & <i>rdd</i>    | AT4G26288 | AT4G26288   |                                                                     |
|                                                 | AT5G25120 | CYP71B11    | cytochrome p450, family 71, subfamily B, polypeptide 11             |
|                                                 | AT1G64390 | GH9C2       | glycosyl hydrolase 9C2                                              |
|                                                 | AT1G76180 | ERD14       | EARLY RESPONSE TO DEHYDRATION 14                                    |
|                                                 | AT2G02100 | LCR69       | low-molecular-weight cysteine-rich 69                               |
|                                                 | AT2G40080 | ELF4        | EARLY FLOWERING 4                                                   |
|                                                 | AT3G08770 | LTP6        | lipid transfer protein 6                                            |
|                                                 | AT3G09440 | AT3G09440   | Heat shock protein 70 (Hsp 70) family protein                       |
| Down-regulated in both <i>dme</i> & <i>rdd</i>  | AT4G36648 | AT4G36648   | other RNA                                                           |
|                                                 | AT5G11740 | AGP15       | arabinogalactan protein 15                                          |
|                                                 | AT1G29920 | CAB2        | chlorophyll A/B-binding protein 2                                   |
|                                                 | AT2G05070 | LHCB2.2     | photosystem II light harvesting complex gene 2.2                    |
|                                                 | AT2G05100 | LHCB2.1     | photosystem II light harvesting complex gene 2.1                    |
|                                                 | AT2G30600 | AT2G30600   | BTB/POZ domain-containing protein                                   |
|                                                 | AT3G15400 | ATA20       | anther 20                                                           |
|                                                 | AT3G15450 | AT3G15450   | Aluminium induced protein with YGL and LRDR motifs                  |
|                                                 | AT3G47340 | ASN1        | glutamine-dependent asparagine synthase 1                           |
|                                                 | AT3G59940 | AT3G59940   | Galactose oxidase/kelch repeat superfamily protein                  |
| AT5G21940                                       | AT5G21940 |             |                                                                     |
|                                                 | AT5G25350 | EBF2        | EIN3-binding F box protein 2                                        |

**Table S2.** Common genes that are down- and up-regulated both in *dme-2* and *ros1/rdd* mutants

|                       | <b>Ler (n=9)</b> | <b>dme-2 (n=11)</b> |
|-----------------------|------------------|---------------------|
|                       | 452.99           | 509.78              |
|                       | 442.46           | 517.52              |
|                       | 434.40           | 578.33              |
|                       | 532.50           | 563.87              |
|                       | 497.29           | 555.42              |
|                       | 480.46           | 518.6               |
|                       | 428.78           | 500.97              |
|                       | 496.68           | 548.97              |
|                       | 446.77           | 576.74              |
|                       |                  | 534.81              |
|                       |                  | 530.34              |
| <b>Average</b>        | 468.04           | 539.58              |
| <b>Median</b>         | 452.99           | 534.81              |
| <b>SD</b>             | 35.34            | 26.88               |
| <b>Student t-test</b> |                  | 8.31E-05            |

**Table S3.** Seed size difference between *Ler* wild type and *dme* homozygous seeds.

Individual seed length of the major axis was measured under stereo microscope. \* $p$

< 0.001, student's *t*-test.

|                  |              | <b>Seed</b> | <b>Seed coat rupture</b> | <b>Endosperm rupture</b> | <b>Total</b> |
|------------------|--------------|-------------|--------------------------|--------------------------|--------------|
| <b>Cold DAG3</b> | <i>Ler</i>   | 58(49%)     | 58(49%)                  | 2(2%)                    | 118          |
|                  | <i>dme-2</i> | 53(63%)     | 31(37%)                  | 0(0%)                    | 84           |
| <b>Cold DAG4</b> | <i>Ler</i>   | 15(14%)     | 82(78%)                  | 8(8%)                    | 105          |
|                  | <i>dme-2</i> | 37(37%)     | 35(35%)                  | 27(27%)                  | 99           |
| <b>Cold DAG7</b> | <i>Ler</i>   | 5(3%)       | 3(2%)                    | 160(95%)                 | 168          |
|                  | <i>dme-2</i> | 17(11%)     | 7(5%)                    | 129(84%)                 | 153          |
|                  |              | <b>Seed</b> | <b>Seed coat rupture</b> | <b>Germinated</b>        | <b>Total</b> |
| <b>Cold DAG8</b> | <i>Ler</i>   | 3(2%)       | 0(0%)                    | 174(98%)                 | 177          |
|                  | <i>dme-2</i> | 13(8%)      | 7(4%)                    | 141(88%)                 | 161          |

**Table S4.** Comparison of seed germination between *Ler* and *dme-2* mutants in continuous cold and light conditions.

Distribution ratio of wild type and *dme-2* seed germination stage was examined from DAG3 to DAG8. \*NG: non-germinating

|      |              | Normal | Abnormal | Total |
|------|--------------|--------|----------|-------|
| DAG2 | <i>Ler</i>   | 16     | 7        | 23    |
|      | <i>dme-1</i> | 13     | 6        | 19    |
|      | <i>dme-2</i> | 8      | 9        | 17    |
| DAG3 | <i>Ler</i>   | 8      | 3        | 11    |
|      | <i>dme-1</i> | 5      | 5        | 10    |
|      | <i>dme-2</i> | 6      | 6        | 12    |
| DAG4 | <i>Ler</i>   | 5      | 7        | 12    |
|      | <i>dme-1</i> | 5      | 8        | 13    |
|      | <i>dme-2</i> | 0      | 10       | 10    |
| DAG5 | <i>Ler</i>   | 6      | 6        | 12    |
|      | <i>dme-1</i> | 2      | 8        | 10    |
|      | <i>dme-2</i> | 0      | 12       | 12    |

**Table S5.** Primary root count of those displaying abnormally distorted QC.

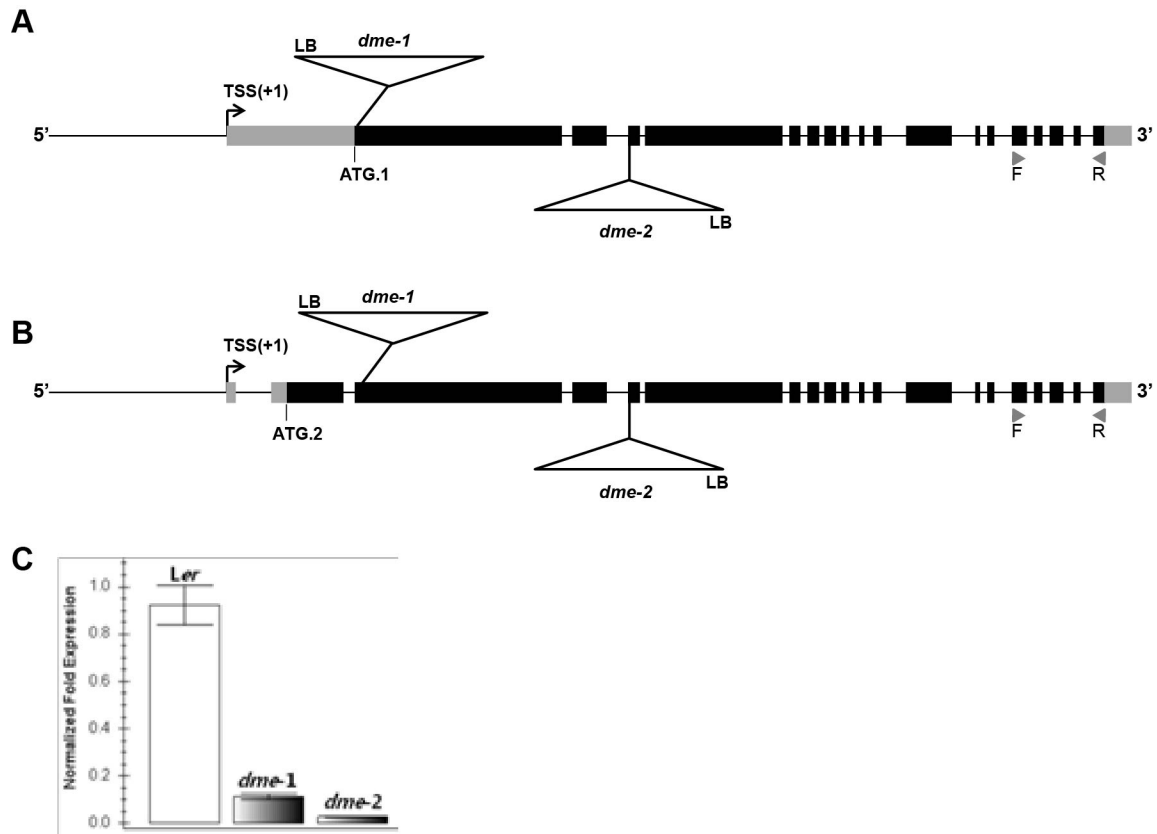

**Fig. S1. T-DNA insertion sites of *dme-1* and *dme-2* alleles relative to two DME gene models.**

(A) Diagram of T-DNA insertion sites of *dme-1* and *dme-2* alleles relative to DME.1 model (At5g04560.1). (B) Diagram of T-DNA insertion sites of *dme-1* and *dme-2* alleles relative to DME.2 model (At5g04560.2). (C) DME RNA expression in *Ler* wild type, *dme-1* and *dme-2* homozygous plants. qRT-PCR primer set is indicated in the (A) and (B) as arrowheads, F and R.



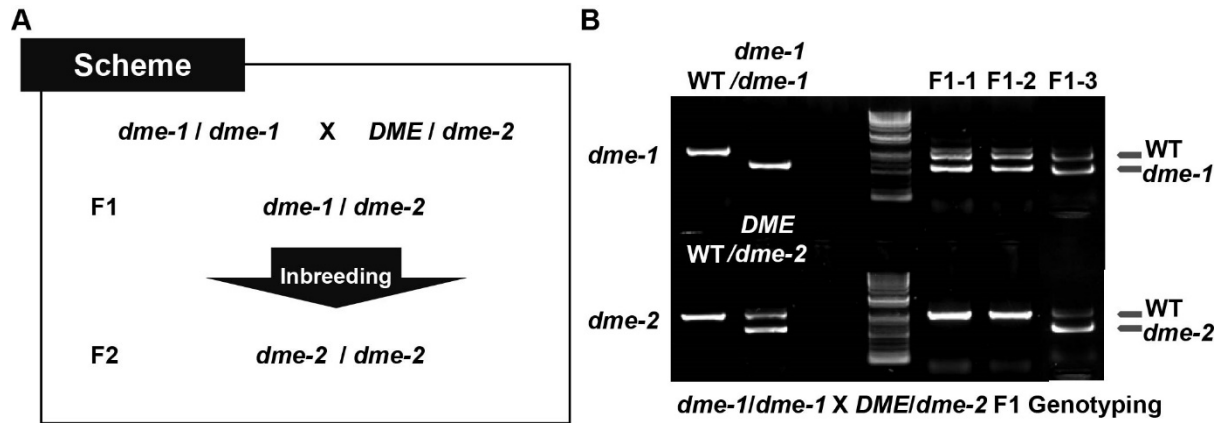

**Fig. S2. Generating homozygous *dme-2* mutants.** (A) The strategy to obtain homozygous *dme-2* mutants using homozygous *dme-1* allele. (B) The control genotyping of the *dme-1* and *DME/dme-2* is shown on the left-hand side. From the initial *dme-1/dme-1* (female) cross with *DME/dme-2* (male), three viable plants were obtained and their genotypes are shown on the right-hand side. F1-1 and F1-2 are *dme-1/DME* and F1-3 is *dme-1/dme-2* hybrid.

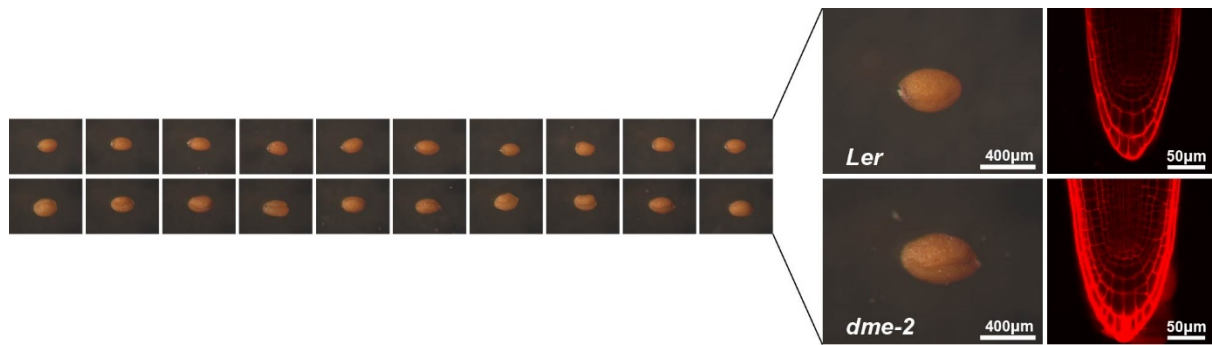

**Fig. S3. *dme-2* mutant roots are larger than wild-type roots.** Comparison of seeds and root tips. Root tips were stained with PI and observed under a confocal microscope.

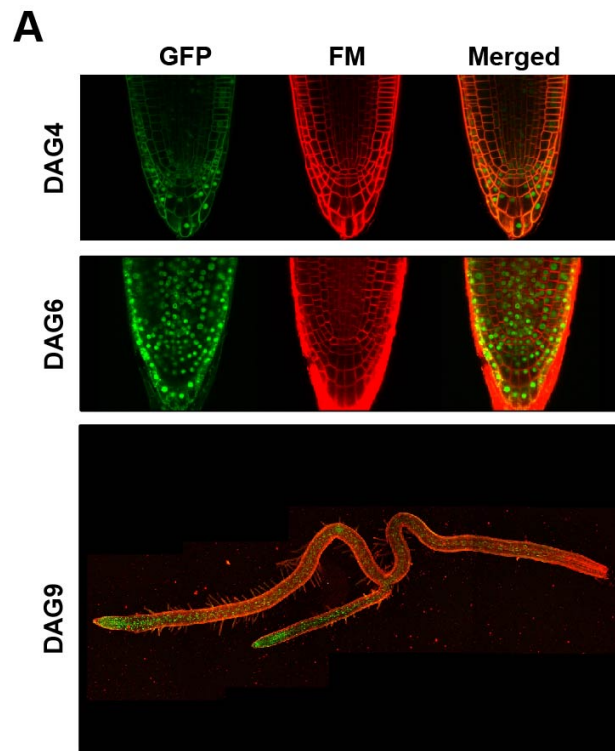

**Fig. S4. DME functions in root development.** DME::GFP expression in the root apical regions and PI-stained roots are merged.

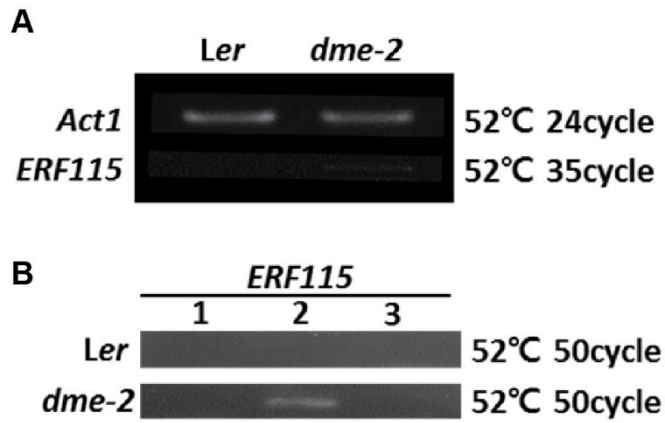

**Fig. S5. *ERF115* overexpression was detected in *dme-2* mutant seedlings. (A)**

An *ERF115* band was detected in *dme-2* with 35 PCR cycles. (B) A clear *ERF115*

band was detected in one *dme-2* sample among three different biological samples of both DAG7 *Ler* and *dme-2* seedlings with 50 cycles.

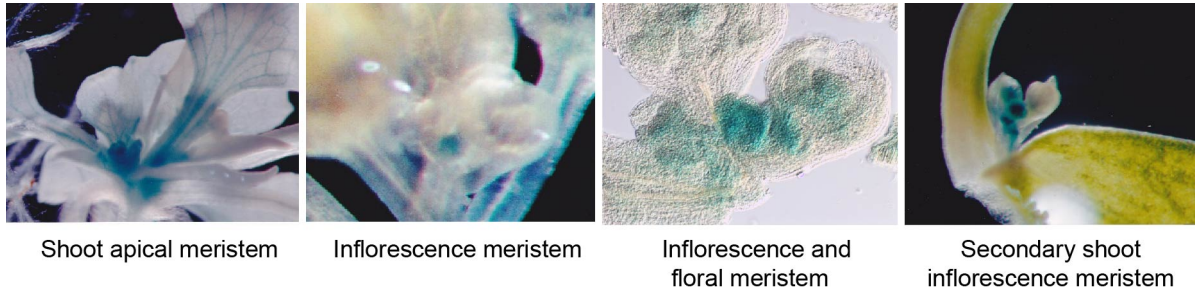

**Fig. S6. 2.3kb *DME:GUS* expression in aerial meristematic zone. *DME:GUS* is specifically expressed in meristematic regions such as SAM, inflorescence meristem and floral meristem.**

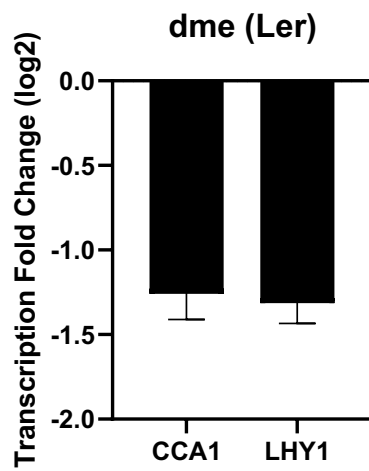

**Fig. S7. *CCA1* and *LHY1* expression are significantly reduced in *dme* mutant seedlings compared to wild type (*Ler*).** Error bar represents standard error of log2 fold change. *p*-value of *CCA1* is 6.17E-16 and *LHY1* is 1.91E-26.
